# Supplementary material
Source: publisher figshare collection journal article supplement (https://brill.figshare.com/articles/dataset/_/9896507)
Supplement: Supplementary file 1 [file 1]

# **Vegetative propagation of elite *Eucalyptus* clones as food source for honeybees (*Apis mellifera*); adventitious roots versus callus formation**

Avi Eliyahu<sup>a,b</sup>, Zvi Duman<sup>a,c</sup>, Sara Sherf<sup>a</sup>, Olga Genin<sup>d</sup>, Yuval Cinnamon<sup>d</sup>, Mohamad Abu-Abied<sup>a</sup>, Roy Weinstain<sup>e</sup>, Arnon Dag<sup>f</sup> and Einat Sadot<sup>a</sup>

<sup>a</sup>The Institute of Plant Sciences, Volcani Center, ARO, Rishon LeZion, 7528809 Israel; <sup>b</sup>The Mina & Everard Goodman Faculty of Life Sciences, Bar-Ilan University, Ramat Gan 5290002 Israel; <sup>c</sup>The Robert H. Smith Institute of Plant Sciences and Genetics in Agriculture, The Robert H. Smith Faculty of Agriculture, Food and Environment, The Hebrew University of Jerusalem, Rehovot 7610001, Israel; <sup>d</sup>The Institute of Animal Sciences, Volcani Center, ARO, Rishon LeZion, 7528809 Israel; <sup>e</sup>The School of Plant Sciences and Food Security, The George S. Wise Faculty of Life Sciences, Tel Aviv University, Tel Aviv, 6997801 Israel; <sup>f</sup>Gilat Research Center, The Institute of Plant Sciences, Volcani Center, ARO, 8510500 Gilat, Israel

## **ABSTRACT**

Summer and autumn in Israel are highly arid with not enough plants in bloom offering nectar and pollen to support the local apiary. This leads to decline in colony health and honey production. To increase food sources for honeybees, we initiated a project to clone elite *Eucalyptus* trees exhibiting constant and rich blooming from late summer to early winter. We induced adventitious roots from cuttings of two mature *Eucalyptus* trees of which nectar production and honeybees' attraction was measured: *Eucalyptus brachyphylla* and *Eucalyptus x trabutii*. During the rooting process, a high frequency of cylindrical callus formation instead of roots was obtained. To shed light on the inner anatomy of the callus chunks, we compared their cell organization and cell-wall composition to those of roots. Whereas in the root, cells were organized in circumferential symmetry, no symmetry was found in the callus. Instead, a more chaotic accumulation of meristematic-like cells with sporadic clusters of tracheary elements laid in different directions were observed. The outer cell layer of the callus often included swollen cells with thin cell walls. Most callus cells stained more strongly for cellulose and lignin than

cells in the root meristem. In addition, specific antibodies to methylesterified and de-methylesterified pectin showed differential staining of callus vs. root cells indicating cell wall differences. Strikingly, roots were seen to differentiate from the chaotic cell organization of the callus, albeit at low rates. Further investigation of the cellular and molecular mechanisms underlying callus formation, are required.

## ARTICLE HISTORY

Received 30 June 2019

Accepted 9 September 2019

## KEYWORDS

Adventitious roots; callus; Eucalyptus; honeybee; cell wall; cellulose; pectin

**CONTACT** Einat Sadot E-mail: vhesadot@agri.gov.il

## Supplementary material

**Movie S1.** HREM imaging of a root forming callus initiated from a *E. brachyphylla* cutting. Beginning with a 3D reconstruction of the callus, and continues with a sequence of the transverse sections (2.6  $\mu$ L each) performed in the sample. The numbers on the sections point on the circular structures surrounding the tracheary elements along the callus which diverge, converge, and disappear alternately, until a root is formed.

**Table S1.** Nectar volume and sugar concentration measurements.

## E × trabutii – Nectar secretion observation

|                              | #  | 08/10/2018       |                  |                  |                  |                  | 09/10/2018       |                  |                  |                  |                  |                  | 10/10/2018       |                  |                  |                  |                  |                  | 11/10/2018       |                  |                  |                  |       |
|------------------------------|----|------------------|------------------|------------------|------------------|------------------|------------------|------------------|------------------|------------------|------------------|------------------|------------------|------------------|------------------|------------------|------------------|------------------|------------------|------------------|------------------|------------------|-------|
|                              |    | 06 <sup>43</sup> | 09 <sup>15</sup> | 11 <sup>57</sup> | 14 <sup>20</sup> | 16 <sup>20</sup> | 06 <sup>50</sup> | 08 <sup>55</sup> | 11 <sup>00</sup> | 13 <sup>21</sup> | 15 <sup>20</sup> | 17 <sup>20</sup> | 06 <sup>40</sup> | 08 <sup>50</sup> | 11 <sup>04</sup> | 13 <sup>00</sup> | 15 <sup>00</sup> | 17 <sup>00</sup> | 06 <sup>50</sup> | 09 <sup>30</sup> | 11 <sup>30</sup> | 13 <sup>30</sup> |       |
| Nectar Volume (NV;µL)        | 1  | 19               | 10               | 1                | 1                | 0                | 21               | 5                | 0                | 1                | 1                | 3                | 43               | 5                | 0                | 0                | 0                | 1                | 41               | 0                | 0                | 0                |       |
|                              | 2  | 7                | 10               | 3                | 1                | 2.5              | 52               | 2                | 8                | 2                | 0                | 2                | 70               | 0                | 0                | 0                | 0                | 0                | 0                | 0                | 0                | 0                |       |
|                              | 3  | 16               | 0                | 9                | 2                | 0.5              | 30               | 0                | 2                | 0                | 0                | 1                | 63               | 0                | 0                | 0                | 0                | 0                | 19               | 0                | 0                | 0                |       |
|                              | 4  | 27               | 4                | 0                | 2.5              | 2.5              | 50               | 0                | 0                | 0                | 0                | 1                | 48               | 0                | 0                | 0                | 0                | 0                | 27               | 0                | 0                | 0                |       |
|                              | 5  | 25               | 1                | 0                | 2                | 0                | 20               | 0                | 0                | 2                | 0                | 1                | 22               | 2                | 0                | 0                | 0                | 0                | 0                | 0                | 0                | 0                |       |
|                              | 6  | 40               | 7                | 3                | 2                | 0.5              | 55               | 4                | 0                | 0                | 1                | 0                | 47               | 7                | 0                | 0                | 0                | 0                | 54               | 0                | 0                | 0                |       |
|                              | 7  | 14               | 0                | 0                | 2.5              | 1                | 45               | 0                | 0                | 0                | 1                | 0                | 68               | 10               | 0                | 0                | 0                | 0                | 0                | 0                | 0                | 0                |       |
|                              | 8  | 26               | 0                | 0                | 1                | 0                | 12               | 0                | 0                | 0                | 1                | 0                | 36               | 4                | 0                | 0                | 0                | 0                | 0                | 0                | 0                | 0                |       |
|                              | 9  | 17               | 0                | 0                | 2                | 0                | 23               | 0                | 0                | 0                | 1                | 0                | 25               | 0                | 0                | 0                | 0                | 0                | 20               | 0                | 0                | 0                |       |
|                              | 10 | 20               | 0                | 0                | 1                | 0                | 25               | 1                | 0                | 0                | 1                | 0                | 26               | 0                | 0                | 0                | 0                | 0                | 70               | 0                | 0                | 0                |       |
| Nectar concentration (NC; %) | 1  | 14               | 30               | N/D              | 30               | -                | 17               | 22               | -                | 16               | N/D              | 22               | 0.25             | 21               | -                | -                | -                | 22               | 20               | -                | -                | -                |       |
|                              | 2  | 14.5             | 23               | 28               | 30               | 30               | 16               | 28               | N/D              | 12               | -                | N/D              | 0.2              | N/D              | -                | -                | -                | -                | -                | -                | -                | -                |       |
|                              | 3  | 13               | -                | 25               | 20               | 30               | 17               | -                | N/D              | -                | -                | N/D              | 0.2              | N/D              | -                | -                | -                | -                | 20               | -                | -                | -                |       |
|                              | 4  | 14               | 26               | -                | 12.5             | 26               | 16               | -                | -                | -                | -                | N/D              | 0.26             | N/D              | -                | -                | -                | -                | 27               | -                | -                | -                |       |
|                              | 5  | 10               | 22               | -                | 21               | -                | 19               | -                | -                | 14               | -                | N/D              | 0.2              | 20.25            | -                | -                | -                | -                | -                | -                | -                | -                |       |
|                              | 6  | 15               | 19               | 26               | 30               | 30               | 18               | 32               | -                | -                | N/D              | -                | 0.28             | 20               | -                | -                | -                | -                | 20               | -                | -                | -                |       |
|                              | 7  | 16               | -                | -                | 30               | 30               | 14               | -                | -                | -                | N/D              | -                | 0.19             | 20               | -                | -                | -                | -                | -                | -                | -                | -                |       |
|                              | 8  | 16               | -                | -                | 32               | -                | 20               | -                | -                | -                | N/D              | -                | 0.26             | 20               | -                | -                | -                | -                | -                | -                | -                | -                |       |
|                              | 9  | 11               | -                | -                | 30               | -                | 16.5             | -                | -                | -                | N/D              | -                | 0.19             | -                | -                | -                | -                | -                | 30               | -                | -                | -                |       |
|                              | 10 | 12               | -                | -                | 32               | -                | 16               | 32               | -                | -                | N/D              | -                | 0.19             | -                | -                | -                | -                | -                | 20               | -                | -                | -                |       |
| Sugar production (mg; NC×NV) | 1  | 2.66             | 3                | -                | 0.3              | 0                | 3.57             | 1.1              | 0                | 0.16             | 0                | 0.66             | 10.7             | 1.05             | 0                | 0                | 0                | 0.22             | 8.2              | 0                | 0                | 0                | 31.67 |
|                              | 2  | 1.01             | 2.3              | 0.84             | 0.3              | 0.75             | 8.32             | 0.56             | 0                | 0.24             | 0                | 0                | 14               | 0                | 0                | 0                | 0                | 0                | 0                | 0                | 0                | 0                | 28.32 |
|                              | 3  | 2.08             | 0                | 2.25             | 0.4              | 0.15             | 5.1              | 0                | 0                | 0                | 0                | 0                | 12.6             | 0                | 0                | 0                | 0                | 0                | 3.8              | 0                | 0                | 0                | 26.38 |
|                              | 4  | 3.78             | 1.04             | 0                | 0.31             | 0.65             | 8                | 0                | 0                | 0                | 0                | 0                | 12.4             | 0                | 0                | 0                | 0                | 0                | 7.29             | 0                | 0                | 0                | 33.55 |
|                              | 5  | 2.5              | 0.22             | 0                | 0.42             | 0                | 3.8              | 0                | 0                | 0.28             | 0                | 0                | 4.4              | 0.40             | 0                | 0                | 0                | 0                | 0                | 0                | 0                | 0                | 12.02 |
|                              | 6  | 6                | 1.33             | 0.78             | 0.6              | 0.15             | 9.9              | 1.28             | 0                | 0                | 0                | 0                | 13.1             | 1.4              | 0                | 0                | 0                | 0                | 10.8             | 0                | 0                | 0                | 45.4  |
|                              | 7  | 2.24             | 0                | 0                | 0.75             | 0.3              | 6.3              | 0                | 0                | 0                | 0                | 0                | 12.9             | 2                | 0                | 0                | 0                | 0                | 0                | 0                | 0                | 0                | 24.51 |
|                              | 8  | 4.16             | 0                | 0                | 0.32             | 0                | 2.4              | 0                | 0                | 0                | 0                | 0                | 9.36             | 0.8              | 0                | 0                | 0                | 0                | 0                | 0                | 0                | 0                | 17.04 |
|                              | 9  | 1.87             | 0                | 0                | 0.6              | 0                | 3.79             | 0                | 0                | 0                | 0                | 0                | 4.75             | 0                | 0                | 0                | 0                | 0                | 6                | 0                | 0                | 0                | 17.01 |
|                              | 10 | 2.4              | 0                | 0                | 0.32             | 0                | 4                | 0.32             | 0                | 0                | 0                | 0                | 4.94             | 0                | 0                | 0                | 0                | 0                | 14               | 0                | 0                | 0                | 25.98 |
| Average (4 Days)             |    |                  |                  |                  |                  |                  |                  |                  |                  |                  |                  |                  |                  |                  |                  |                  |                  |                  |                  |                  |                  | 26.18            |       |

## E. brachyphylla – Nectar secretion observation

|                                          | #  | 19/11/2018       |                  |                  |                  |                  | 20/11/2018       |                  |                  |                  |                  |                  | 21/11/2018       |                  |                  |                  |                  | 22/11/2018       |                  |       |
|------------------------------------------|----|------------------|------------------|------------------|------------------|------------------|------------------|------------------|------------------|------------------|------------------|------------------|------------------|------------------|------------------|------------------|------------------|------------------|------------------|-------|
|                                          |    | 06 <sup>30</sup> | 08 <sup>30</sup> | 11 <sup>15</sup> | 14 <sup>36</sup> | 16 <sup>15</sup> | 06 <sup>30</sup> | 08 <sup>30</sup> | 10 <sup>30</sup> | 12 <sup>30</sup> | 14 <sup>30</sup> | 16 <sup>00</sup> | 06 <sup>30</sup> | 08 <sup>45</sup> | 10 <sup>45</sup> | 12 <sup>45</sup> | 15 <sup>40</sup> | 07 <sup>30</sup> | 09 <sup>30</sup> |       |
| Nectar Volume (NV; $\mu$ L)              | 1  | 9                | 0                | 0                | 0                | 2                | 38               | 5                | 3                | 1                | 1.5              | 5                | 35               | 6                | 2                | 0                | 1                | 23.00            | 0                |       |
|                                          | 2  | 10               | 0                | 0                | 0                | 0                | 12               | 0                | 0                | 0                | 0                | 0.5              | 16               | 2                | 0                | 0                | 1                | 7.50             | 0                |       |
|                                          | 3  | 10               | 0                | 0                | 0                | 0                | 25               | 8                | 0                | 1                | 0.5              | 0.5              | 15               | 2.5              | 0                | 0                | 1                | 4.00             | 0                |       |
|                                          | 4  | 22               | 20               | 0                | 0                | 2                | 11               | 7                | 0                | 0                | 2.5              | 2                | 24               | 5                | 1.5              | 0                | 1                | 34.00            | 0                |       |
|                                          | 5  | 10               | 13               | 0                | 0                | 6                | 30               | 12               | 1                | 0.5              | 0                | 0                |                  | 1                | 0                | 0                | 0                | 11.00            | 0                |       |
|                                          | 6  | 26               | 0                | 2                | 0                | 0                | 69               | 9                | 1                | 5                | 5                | 4                | 40               | 17               | 2.5              | 1.5              | 7                | 36.00            | 2                |       |
|                                          | 7  | 20               | 0                | 0                | 0                | 6                | 20               | 2.5              | 0.5              | 0                | 2                | 0                | 44               | 15               | 1.5              | 0                | 3                | 45.00            | 4                |       |
|                                          | 8  | 20               | 0                | 0                | 0                | 0                | 12               | 0.5              | 0                | 0                | 0                | 0                | 10               | 19               | 0                | 0                | 0                | 0.00             | 0                |       |
|                                          | 9  | 15               | 0                | 0                | 0                | 5                | 36               | 2.5              | 0                | 0                | 0                | 0.5              | 13               | 13               | 0                | 0                | 0                | 3.50             | 0                |       |
|                                          | 10 | 15               | 0                | 0                | 0                | 2                | 45               | 0                | 0                | 0                | 0                | 0                | 20               | 13               | 0                | 0                | 0                | 8.50             | 0                |       |
| Nectar concentration (NC; %)             | 1  | 32               | -                | -                | -                | 28               | 13               | 10               | 12               | 29               | 32               | 31               | 21               | 16               | 29               | -                | 42               | 15               | -                |       |
|                                          | 2  | 23               | -                | -                | -                | -                | 11               | -                | -                | -                | -                | 27               | 11               | 17               | -                | -                | 39               | 15               | -                |       |
|                                          | 3  | 21               | -                | -                | -                | -                | 11               | 14               | -                | 29               | 21               | 23               | 11               | 16               | -                | -                | 35               | 13               | -                |       |
|                                          | 4  | 23               | 28               | -                | -                | 24               | 10               | 14               | -                | -                | 30               | 32               | 12               | 13               | 33               | -                | 35               | 13               | -                |       |
|                                          | 5  | 21               | 30               | -                | -                | 10               | 13               | 15               | 31               | 14               | -                | -                |                  |                  | -                | -                | -                | 15               | -                |       |
|                                          | 6  | 26               | -                | 30               | -                | -                | 17               | 29               | 16               | 10               | 31               | 22               | 30               | 17               | 35               | 51               | 22               | 16               | 44               |       |
|                                          | 7  | 31               | -                | -                | -                | 23               | 20               | 25               | 16               | -                | 18               | -                | 12               | 15               | 35               | -                | 35               | 17               | 28               |       |
|                                          | 8  | 17               | -                | -                | -                | -                | 18               | 15               | -                | -                | -                | -                | 12               | 19               | -                | -                | -                | -                | -                |       |
|                                          | 9  | 21               | -                | -                | -                | 30               | 12               | 15               | -                | -                | -                | -                | 11               | 13               | -                | -                | -                | 15               | -                |       |
|                                          | 10 | 19               | -                | -                | -                | 31               | 13               | 15               | -                | -                | -                | -                | 12               | 13               | -                | -                | -                | 15               | -                | Sum   |
| Sugar production (mg;<br>NC $\times$ NV) | 1  | 2.88             | 0                | 0                | 0                | 0.56             | 4.94             | 0.5              | 0.36             | 0.29             | 0.48             | 1.55             | 7.35             | 0.96             | 0.58             | 0                | 0.42             | 3.45             | 0                | 24.32 |
|                                          | 2  | 2.3              | 0                | 0                | 0                | 0                | 1.32             | 0                | 0                | 0                | 0                | 0.13             | 1.76             | 0.34             | 0                | 0                | 0.39             | 1.12             | 0                | 7.37  |
|                                          | 3  | 2.1              | 0                | 0                | 0                | 0                | 2.75             | 1.12             | 0                | 0.29             | 0.10             | 0.11             | 1.65             | 0.4              | 0                | 0                | 0.35             | 0.52             | 0                | 9.4   |
|                                          | 4  | 5.06             | 5.6              | 0                | 0                | 0.48             | 1.1              | 0.98             | 0                | 0                | 0.75             | 0.64             | 2.88             | 0.65             | 0.49             | 0                | 0.35             | 4.42             | 0                | 23.4  |
|                                          | 5  | 2.1              | 3.9              | 0                | 0                | 0.6              | 3.9              | 1.8              | 0.31             | 0.07             | 0                | 0                | 0                | 0                | 0                | 0                | 0                | 1.65             | 0                | 14.33 |
|                                          | 6  | 6.76             | 0                | 0.6              | 0                | 0                | 11.7             | 2.61             | 0.16             | 0.5              | 1.55             | 0.88             | 12               | 2.89             | 0.87             | 0.76             | 1.54             | 5.76             | 0.88             | 49.5  |
|                                          | 7  | 6.2              | 0                | 0                | 0                | 1.38             | 4                | 0.625            | 0.08             | 0                | 0.36             | 0                | 5.28             | 2.25             | 0.52             | 0                | 1.05             | 7.65             | 1.12             | 30.52 |
|                                          | 8  | 3.4              | 0                | 0                | 0                | 0                | 2.16             | 0.07             | 0                | 0                | 0                | 0                | 1.2              | 3.61             | 0                | 0                | 0                | 0                | 0                | 10.44 |

|                  |    |      |   |   |   |      |      |      |   |   |   |   |      |      |   |   |   |       |   |              |
|------------------|----|------|---|---|---|------|------|------|---|---|---|---|------|------|---|---|---|-------|---|--------------|
|                  | 9  | 3.15 | 0 | 0 | 0 | 1.5  | 4.32 | 0.38 | 0 | 0 | 0 | 0 | 1.43 | 1.69 | 0 | 0 | 0 | 0.52  | 0 | <b>12.99</b> |
|                  | 10 | 2.85 | 0 | 0 | 0 | 0.62 | 5.85 | 0    | 0 | 0 | 0 | 0 | 2.4  | 1.69 | 0 | 0 | 0 | 1.275 | 0 | <b>14.68</b> |
| Average (4 Days) |    |      |   |   |   |      |      |      |   |   |   |   |      |      |   |   |   |       |   | <b>19.69</b> |
| STDEV            |    |      |   |   |   |      |      |      |   |   |   |   |      |      |   |   |   |       |   | <b>12.83</b> |
